# Supplementary material for: mTOR pathway activation is a favorable prognostic factor in human prostate adenocarcinoma
Source: PubMed Central journal article supplement (PMC5078062; doi:10.18632/oncotarget.8767), 2016-04-16
Supplement: oncotarget-07-32916-s001.pdf [file oncotarget-07-32916-s001.pdf]

## **mTOR pathway activation is a favorable prognostic factor in human prostate adenocarcinoma**

### **SUPPLEMENTARY TABLES**

**Supplementary Table S1: Correlation with mTOR-2448 phosphorylation (TCGA, RPPA data)**

See Supplementary File 1

**Supplementary Table S2: Antibodies and staining information for Ventana Benchmark® Ultra system automatic monostainer**

| <b>Protein</b> | <b>phospho-site</b> | <b>Company</b> | <b>Cat. No.</b> | <b>Clone</b> | <b>Titer</b> | <b>antigen retrieval</b> | <b>primary</b> |
|----------------|---------------------|----------------|-----------------|--------------|--------------|--------------------------|----------------|
| mTOR           | Ser2448             | Cell Signaling | 2971            | 49F9         | 1:200        | 32 min CC-1 at 95°C      | 60 min at 36°C |
| S6R            | Ser240/244          | Cell Signaling | 5364            | D68F8        | 1:1000       | 32 min CC-1 at 95°C      | 32 min at 36°C |
| 4EBP1          | Thr37/46            | Cell Signaling | 2855            | 236B4        | 1:750        | 32 min CC-1 at 95°C      | 60 min at 36°C |
